# Supplementary material for: Counteracting Roles of Lipidic Aldehydes and Phenolic Antioxidants on Soy Protein Oxidation Defined by a Chemometric Survey of Solvent and Mechanically Extracted Soybean Meals
Source: MDPI journal article supplement (doi:10.3390/antiox12071419), 2023-07-13
Supplement: s1 [file s1]

# Counteracting Roles of Lipidic Aldehydes and Phenolic Antioxidants on Soy Protein Oxidation Defined by a Chemometric Survey of Solvent and Mechanically Extracted Soybean Meals

Junwei Zhang <sup>1</sup>, Pedro E. Urriola <sup>2</sup>, Seth L. Naeve <sup>3</sup>, Gerald C. Shurson <sup>2,\*</sup> and Chi Chen <sup>1,\*</sup>

<sup>1</sup> Department of Food Science and Nutrition, University of Minnesota, St. Paul, MN 55108, USA

<sup>2</sup> Department of Animal Science, University of Minnesota, St. Paul, MN 55108, USA

<sup>3</sup> Department of Agronomy and Plant Genetics, University of Minnesota, St. Paul, MN 55108, USA

\* Correspondence: shurs001@umn.edu, chichen@umn.edu

## Supplementary Data

**Table S1. Sources of Chemicals and Reagents Used in Chemical Analysis, LC-MS Analysis, Structural Confirmation and Quantification.**

| Chemicals and reagents                                                                                                                                                                                                                        | Vendors                                    |
|-----------------------------------------------------------------------------------------------------------------------------------------------------------------------------------------------------------------------------------------------|--------------------------------------------|
| 6-Hydroxy-2,5,7,8-tetramethylchroman-2-carboxylic acid (Trolox), Trichloroacetic acid                                                                                                                                                         | Acros Organics (Morris Plains, NJ)         |
| Guanidine hydrochloride, 2-hydrazinoquinoline (HQ), Triphenylphosphine (TPP)                                                                                                                                                                  | Alfa Aesar (Tewksbury, MA)                 |
| Methanol (HPLC grade)                                                                                                                                                                                                                         | Avantor performance materials (Radnor, PA) |
| Aldehyde standards*: 2-decenal, 2-hexenal, 2-heptenal, 2,4-heptadienal, octanal, 2-octenal, nonanal, 2-nonenal, 2,4-nonadienal                                                                                                                | Bedoukian Research (Danbury, CT)           |
| (2,2'-azino-bis (3-ethylbenzothiazoline-6-sulphonic acid) diammonium salt (ABTS)                                                                                                                                                              | Chem-Impex International (Wood Dale, IL)   |
| Acetonitrile (HPLC-MS grade), Ammonium acetate (HPLC-MS grade), <i>p</i> -anisidine, 2,4-dinitrophenylhydrazine (DNPH), Formic acid (HPLC-MS grade), Hydrochloric acid, Isooctane (HPLC grade), Sulfadimethoxine (SDM), Water (HPLC-MS grade) | Fisher Scientific (Houston, TX)            |
| Isoflavone standards#: Daidzein, Daidzin, Genistein, Genistin                                                                                                                                                                                 | MedChemExpress (Princeton, NJ)             |
| 2,2'-Dipyridyl disulfide (DPDS)                                                                                                                                                                                                               | MP Biomedicals, LLC (Irvine, CA)           |
| Tripentadecanoin (TG, 15:0, 15:0, 15:0)                                                                                                                                                                                                       | Nu-Chek Prep, Inc (Elysian, MN)            |
| Dimethyl sulfoxide (DMSO), Ethanol, Ethyl acetate, Folin–Ciocalteu reagent, Sodium carbonate, $\alpha$ -tocopherol <sup>^</sup> , $\gamma$ -tocopherol <sup>^</sup>                                                                           | Sigma-Aldrich (St. Louis, MO)              |

\* Aldehyde standards were dissolved in methanol containing 10  $\mu$ M acetone-d<sub>6</sub> (internal standard) to obtain working standard solutions with the concentration of 0, 5, 12.5, 25, 50, 125, 250 and 500  $\mu$ M.

# Isoflavone standards were firstly dissolved in DMSO to prepare stock solution (10 mg/mL), and then diluted with methanol containing 1  $\mu$ M SDM (internal standard) to obtain working standard solutions with the concentration of 0, 0.125, 0.25, 0.5, 1.25, 2.5, 6.25, 12.5, 25 and 62.5  $\mu$ g/mL.

^ Tocopherol standards were dissolved in methanol containing 5 µg/mL TG (internal standard) and then diluted to obtain working standard solutions with the concentration of 0, 0.05, 0.125, 0.25, 0.5, 1.25, 2.5, 5 and 12.5 µg/mL.

**Table S2. AOAC (2007) Methods for the Proximate Analysis of SSBM and MSBM Samples**

| Proximate analysis components | Procedures  |
|-------------------------------|-------------|
| Crude protein                 | AOAC 984.13 |
| Ash                           | AOAC 942.05 |
| Ether extract                 | AOAC 920.39 |
| Crude fiber                   | AOAC 978.10 |
| Moisture                      | AOAC 934.01 |

**Table S3. LC-MS Data Acquisition Conditions in a 10-minute Run.**

| Target compounds | Column type | Mobile phase                                                                                                                                                                          | MS detection mode | Capillary and cone voltage | Source and desolvation temperature | Cone and desolvation gas          | Collision gas |
|------------------|-------------|---------------------------------------------------------------------------------------------------------------------------------------------------------------------------------------|-------------------|----------------------------|------------------------------------|-----------------------------------|---------------|
| Aldehydes        | BEH C18     | A: H <sub>2</sub> O containing 0.05% acetic acid (v/v) and 2 mM ammonium acetate<br>B: H <sub>2</sub> O/ACN = 5:95 (v/v) containing 0.05% acetic acid (v/v) and 2 mM ammonium acetate | Positive          | 0.2 kV, 40 V               | 120 °C, 350 °C                     | 50 L/h, 600 L/h (N <sub>2</sub> ) | Argon         |
| Tocopherols      | BEH C8      | A: H <sub>2</sub> O containing 0.02% formic acid (v/v) and 0.1 mM ammonium formate<br>B: Methanol containing 0.02% formic acid (v/v) and 0.1 mM ammonium formate                      | Positive          | 0.5 kV, 40 V               | 120 °C, 350 °C                     | 50 L/h, 600 L/h (N <sub>2</sub> ) | Argon         |
| Isoflavones      | BEH C18     | A: H <sub>2</sub> O containing 0.1% formic acid (v/v)<br>B: Methanol                                                                                                                  | Positive          | 0.2 kV, 40 V               | 120 °C, 350 °C                     | 50 L/h, 600 L/h (N <sub>2</sub> ) | Argon         |

**Table S4. Gross Composition of SSBM and MSBM Samples**

| #  | Sample type | Year | Crude protein<br>(% DM) | Ash<br>(% DM) | Ether extract<br>(% DM) | Crude fiber<br>(% DM) | Moisture<br>(%) | Water<br>activity |
|----|-------------|------|-------------------------|---------------|-------------------------|-----------------------|-----------------|-------------------|
| 1  | SSBM        | 2020 | 52.29                   | 7.03          | 1.46                    | 3.91                  | 10.30           | 0.59              |
| 2  | SSBM        | 2020 | 51.94                   | 6.80          | 1.17                    | 4.17                  | 10.93           | 0.63              |
| 3  | SSBM        | 2020 | 52.19                   | 6.69          | 0.96                    | 4.00                  | 12.23           | 0.68              |
| 4  | SSBM        | 2020 | 52.92                   | 6.65          | 1.03                    | 4.08                  | 10.25           | 0.61              |
| 5  | SSBM        | 2020 | 52.56                   | 6.91          | 0.99                    | 3.60                  | 10.75           | 0.64              |
| 6  | SSBM        | 2020 | 52.35                   | 7.07          | 1.55                    | 3.68                  | 10.52           | 0.63              |
| 7  | SSBM        | 2020 | 52.38                   | 7.06          | 0.81                    | 3.13                  | 10.42           | 0.56              |
| 8  | SSBM        | 2020 | 53.04                   | 7.68          | 0.92                    | 3.64                  | 11.71           | 0.66              |
| 9  | SSBM        | 2020 | 53.42                   | 6.79          | 0.59                    | 3.72                  | 10.70           | 0.62              |
| 10 | SSBM        | 2020 | 52.96                   | 6.97          | 1.34                    | 3.55                  | 10.03           | 0.58              |
| 11 | SSBM        | 2020 | 50.89                   | 7.11          | 1.03                    | 3.99                  | 9.05            | 0.57              |
| 12 | SSBM        | 2020 | 53.50                   | 6.77          | 1.25                    | 3.41                  | 10.43           | 0.61              |
| 13 | SSBM        | 2020 | 53.99                   | 6.92          | 0.71                    | 3.27                  | 9.44            | 0.58              |
| 14 | SSBM        | 2020 | 51.23                   | 6.94          | 1.27                    | 4.91                  | 10.38           | 0.63              |
| 15 | SSBM        | 2020 | 54.24                   | 6.97          | 0.55                    | 3.27                  | 11.25           | 0.66              |
| 16 | SSBM        | 2020 | 51.28                   | 6.92          | 1.70                    | 3.92                  | 10.51           | 0.62              |
| 17 | SSBM        | 2020 | 51.76                   | 6.94          | 0.95                    | 4.35                  | 10.35           | 0.64              |
| 18 | SSBM        | 2020 | 51.12                   | 6.93          | 1.13                    | 4.13                  | 10.87           | 0.65              |
| 19 | SSBM        | 2020 | 51.82                   | 6.77          | 2.22                    | 3.67                  | 9.88            | 0.61              |
| 20 | SSBM        | 2020 | 52.53                   | 8.99          | 1.96                    | 4.31                  | 10.02           | 0.62              |
| 21 | SSBM        | 2020 | 53.10                   | 7.39          | 1.55                    | 3.76                  | 10.79           | 0.64              |
| 22 | SSBM        | 2020 | 53.05                   | 6.87          | 1.45                    | 3.57                  | 9.96            | 0.61              |
| 23 | SSBM        | 2020 | 53.79                   | 7.93          | 2.07                    | 3.33                  | 10.44           | 0.63              |
| 24 | SSBM        | 2020 | 53.85                   | 6.95          | 0.65                    | 4.02                  | 11.11           | 0.65              |
| 25 | SSBM        | 2020 | 53.25                   | 7.11          | 1.15                    | 3.48                  | 10.41           | 0.63              |
| 26 | SSBM        | 2020 | 51.51                   | 6.90          | 1.54                    | 4.13                  | 8.55            | 0.61              |
| 27 | SSBM        | 2020 | 50.95                   | 7.09          | 0.80                    | 4.31                  | 9.08            | 0.63              |
| 28 | SSBM        | 2020 | 51.62                   | 6.88          | 1.47                    | 4.10                  | 9.92            | 0.65              |
| 29 | SSBM        | 2020 | 52.51                   | 7.48          | 2.48                    | 4.30                  | 10.21           | 0.65              |
| 30 | SSBM        | 2020 | 52.06                   | 6.68          | 2.66                    | 3.55                  | 10.03           | 0.63              |
| 31 | SSBM        | 2020 | 51.90                   | 6.98          | 1.44                    | 4.00                  | 10.36           | 0.65              |
| 32 | SSBM        | 2020 | 52.30                   | 6.58          | 2.53                    | 3.82                  | 10.04           | 0.63              |
| 33 | SSBM        | 2020 | 51.45                   | 6.89          | 3.60                    | 3.39                  | 9.39            | 0.63              |

|             |      |      |       |      |      |      |       |      |
|-------------|------|------|-------|------|------|------|-------|------|
| 34          | SSBM | 2020 | 51.27 | 6.82 | 2.44 | 4.32 | 9.87  | 0.61 |
| 35          | SSBM | 2020 | 50.55 | 6.86 | 1.31 | 4.59 | 9.90  | 0.62 |
| 36          | SSBM | 2020 | 52.05 | 6.53 | 1.78 | 4.45 | 10.53 | 0.64 |
| 37          | SSBM | 2020 | 49.58 | 7.19 | 1.67 | 5.10 | 10.73 | 0.66 |
| 38          | SSBM | 2020 | 52.37 | 7.10 | 1.35 | 3.71 | 9.88  | 0.61 |
| 39          | SSBM | 2021 | 50.36 | 7.16 | 1.40 | 4.29 | 9.35  | 0.61 |
| 40          | SSBM | 2021 | 54.15 | 7.11 | 2.21 | 3.27 | 9.48  | 0.61 |
| 41          | SSBM | 2021 | 54.49 | 7.12 | 2.28 | 2.94 | 9.30  | 0.61 |
| 42          | SSBM | 2021 | 50.74 | 6.78 | 1.02 | 4.24 | 9.03  | 0.59 |
| 43          | SSBM | 2021 | 52.16 | 6.79 | 0.97 | 3.57 | 9.45  | 0.58 |
| 44          | SSBM | 2021 | 51.03 | 7.31 | 1.62 | 3.72 | 8.78  | 0.59 |
| 45          | SSBM | 2021 | 51.94 | 6.75 | 2.63 | 4.11 | 9.43  | 0.60 |
| 46          | SSBM | 2021 | 52.59 | 6.90 | 1.66 | 4.09 | 9.77  | 0.61 |
| 47          | SSBM | 2021 | 52.80 | 6.69 | 1.59 | 3.51 | 10.60 | 0.64 |
| 48          | SSBM | 2021 | 53.13 | 6.97 | 1.44 | 3.57 | 9.53  | 0.61 |
| 49          | SSBM | 2021 | 51.00 | 6.85 | 3.88 | 4.08 | 9.36  | 0.62 |
| 50          | SSBM | 2021 | 53.22 | 6.58 | 2.43 | 3.49 | 9.47  | 0.61 |
| 51          | SSBM | 2021 | 52.26 | 7.10 | 2.32 | 4.31 | 11.08 | 0.67 |
| 52          | SSBM | 2021 | 52.70 | 6.88 | 1.77 | 3.58 | 8.90  | 0.62 |
| 53          | SSBM | 2021 | 51.37 | 7.26 | 1.88 | 3.27 | 11.81 | 0.66 |
| 54 (HP300)* | SSBM | 2021 | 59.22 | 7.44 | 2.19 | 5.00 | 6.97  | 0.37 |
| 55          | MSBM | 2021 | 46.07 | 6.45 | 5.89 | 6.11 | 5.30  | 0.34 |
| 56          | MSBM | 2021 | 47.54 | 6.07 | 6.86 | 6.68 | 5.24  | 0.40 |
| 57          | MSBM | 2021 | 44.19 | 6.06 | 6.40 | 5.96 | 5.13  | 0.34 |
| 58          | MSBM | 2021 | 48.52 | 6.19 | 6.58 | 9.06 | 3.71  | 0.30 |
| 59          | MSBM | 2021 | 45.35 | 6.17 | 6.76 | 6.16 | 4.92  | 0.32 |
| 60          | MSBM | 2021 | 49.23 | 6.08 | 8.93 | 5.67 | 5.53  | 0.40 |
| 61          | MSBM | 2021 | 48.22 | 6.38 | 6.54 | 5.42 | 4.68  | 0.28 |
| 62          | MSBM | 2021 | 46.07 | 6.39 | 7.41 | 5.96 | 6.83  | 0.45 |

\* This sample was produced by treating conventional SSBM with a mixture of enzymes and posttreatment heating.

Table S5. Protein and Lipid Oxidation of SSBM and MSBM Samples

| #  | Sample type | Year | Carbonyl content (μmol/g protein) | <i>p</i> -AV | 2-hexenal | 2,4-heptadienal | 2-heptenal | Octanal | 2-octenal | Nonanal | 2-nonenal | 2,4-nonadienal | 2-decenal | Total   |
|----|-------------|------|-----------------------------------|--------------|-----------|-----------------|------------|---------|-----------|---------|-----------|----------------|-----------|---------|
|    |             |      |                                   |              | ng/g, DM  |                 |            |         |           |         |           |                |           |         |
| 1  | SSBM        | 2020 | 5.5                               | 0.05         | 207.1     | 621.0           | 5081.2     | 103.2   | 1343.7    | 120.0   | 101.9     | 13.8           | 3026.4    | 10618.3 |
| 2  | SSBM        | 2020 | 6.8                               | 0.54         | 252.5     | 832.1           | 5144.4     | 52.9    | 984.0     | 88.5    | 97.0      | 6.0            | 2904.6    | 10362.0 |
| 3  | SSBM        | 2020 | 4.2                               | 0.41         | 26.2      | 132.6           | 1490.4     | 15.5    | 137.7     | 38.7    | 12.2      | 4.2            | 559.5     | 2417.0  |
| 4  | SSBM        | 2020 | 4.8                               | 0.67         | 16.9      | 92.4            | 1323.3     | 3.9     | 51.9      | 35.3    | 6.8       | 2.9            | 321.9     | 1855.3  |
| 5  | SSBM        | 2020 | 4.0                               | 0.54         | 102.5     | 391.4           | 2982.3     | 36.1    | 539.3     | 47.3    | 43.8      | 3.5            | 1582.7    | 5729.0  |
| 6  | SSBM        | 2020 | 6.0                               | 0.30         | 5.1       | 14.2            | 421.5      | 4.0     | 14.7      | 35.6    | 7.3       | 4.6            | 59.8      | 566.9   |
| 7  | SSBM        | 2020 | 5.7                               | 0.67         | 18.0      | 71.7            | 1086.2     | 3.6     | 53.5      | 13.2    | 3.6       | 1.7            | 257.4     | 1509.0  |
| 8  | SSBM        | 2020 | 4.2                               | 0.94         | 13.8      | 44.1            | 956.7      | 0.0     | 10.4      | 51.1    | 5.8       | 4.2            | 129.2     | 1215.1  |
| 9  | SSBM        | 2020 | 6.4                               | 0.00         | 4.6       | 8.5             | 247.7      | 4.0     | 12.4      | 25.9    | 10.0      | 2.8            | 51.1      | 366.9   |
| 10 | SSBM        | 2020 | 4.2                               | 0.16         | 3.6       | 7.5             | 194.9      | 1.5     | 17.4      | 14.1    | 2.6       | 1.2            | 23.1      | 265.9   |
| 11 | SSBM        | 2020 | 4.6                               | 0.52         | 3.4       | 12.4            | 318.1      | 1.1     | 13.4      | 16.1    | 4.9       | 2.8            | 40.8      | 413.0   |
| 12 | SSBM        | 2020 | 4.6                               | 0.37         | 2.2       | 6.2             | 157.1      | 0.9     | 8.1       | 17.8    | 2.6       | 2.1            | 22.7      | 219.7   |
| 13 | SSBM        | 2020 | 5.2                               | 0.16         | 6.2       | 26.8            | 569.4      | 4.4     | 26.3      | 38.9    | 5.9       | 5.7            | 83.0      | 766.6   |
| 14 | SSBM        | 2020 | 4.8                               | 0.13         | 6.1       | 24.5            | 584.6      | 9.4     | 42.4      | 57.2    | 8.3       | 6.8            | 116.3     | 855.6   |
| 15 | SSBM        | 2020 | 4.1                               | 0.32         | 8.6       | 29.0            | 627.4      | 0.0     | 11.1      | 22.6    | 3.8       | 2.3            | 72.4      | 777.1   |
| 16 | SSBM        | 2020 | 9.3                               | 0.21         | 3.7       | 16.8            | 419.8      | 3.5     | 23.7      | 37.4    | 7.9       | 5.8            | 63.4      | 581.9   |
| 17 | SSBM        | 2020 | 5.8                               | 0.25         | 5.8       | 22.2            | 520.6      | 3.4     | 28.1      | 33.3    | 6.8       | 6.7            | 87.3      | 714.1   |
| 18 | SSBM        | 2020 | 4.3                               | 0.16         | 4.1       | 18.0            | 414.9      | 2.9     | 30.4      | 40.1    | 10.2      | 5.1            | 56.7      | 582.6   |
| 19 | SSBM        | 2020 | 4.3                               | 0.12         | 3.1       | 22.1            | 466.5      | 0.0     | 9.5       | 25.5    | 5.5       | 2.5            | 45.4      | 580.1   |
| 20 | SSBM        | 2020 | 4.9                               | 2.13         | 69.4      | 389.1           | 3475.6     | 5.3     | 166.6     | 47.5    | 15.6      | 1.8            | 1129.7    | 5300.5  |
| 21 | SSBM        | 2020 | 6.2                               | 0.79         | 24.5      | 57.0            | 1101.4     | 0.0     | 13.0      | 48.9    | 7.5       | 2.7            | 183.5     | 1438.5  |
| 22 | SSBM        | 2020 | 5.0                               | 0.59         | 3.1       | 12.8            | 303.0      | 3.5     | 18.3      | 46.9    | 10.2      | 6.8            | 50.9      | 455.5   |
| 23 | SSBM        | 2020 | 6.6                               | 0.60         | 10.9      | 31.4            | 511.6      | 4.4     | 40.0      | 23.5    | 11.2      | 20.1           | 81.0      | 734.2   |
| 24 | SSBM        | 2020 | 6.3                               | 0.00         | 4.6       | 12.9            | 334.7      | 3.3     | 18.1      | 35.0    | 9.9       | 5.5            | 49.6      | 473.6   |
| 25 | SSBM        | 2020 | 3.1                               | 0.15         | 3.1       | 12.1            | 348.0      | 4.5     | 20.4      | 49.4    | 7.2       | 5.6            | 68.8      | 519.1   |
| 26 | SSBM        | 2020 | 4.2                               | 0.28         | 7.0       | 26.4            | 650.1      | 5.0     | 36.9      | 44.4    | 11.4      | 7.1            | 120.7     | 909.0   |
| 27 | SSBM        | 2020 | 3.6                               | 0.08         | 16.0      | 38.8            | 766.5      | 3.5     | 30.7      | 37.0    | 9.2       | 10.7           | 83.5      | 996.0   |
| 28 | SSBM        | 2020 | 4.6                               | 0.18         | 12.7      | 20.3            | 472.2      | 7.0     | 28.3      | 107.9   | 17.0      | 17.3           | 69.5      | 752.3   |
| 29 | SSBM        | 2020 | 5.3                               | 0.96         | 170.9     | 630.6           | 5326.0     | 8.3     | 252.4     | 50.1    | 21.5      | 4.1            | 1428.6    | 7892.4  |
| 30 | SSBM        | 2020 | 6.2                               | 0.14         | 0.6       | 3.1             | 66.0       | 11.1    | 9.7       | 71.8    | 9.9       | 2.1            | 278.9     | 453.2   |
| 31 | SSBM        | 2020 | 5.6                               | 0.31         | 3.2       | 12.6            | 348.8      | 0.7     | 19.5      | 36.3    | 7.9       | 5.9            | 55.8      | 490.8   |
| 32 | SSBM        | 2020 | 3.0                               | 0.31         | 4.2       | 21.6            | 285.4      | 2.7     | 19.3      | 107.8   | 13.5      | 8.4            | 46.7      | 509.6   |

|                 |      |      |      |      |       |        |         |       |        |       |       |      |        |         |
|-----------------|------|------|------|------|-------|--------|---------|-------|--------|-------|-------|------|--------|---------|
| 33              | SSBM | 2020 | 5.2  | 0.88 | 3.4   | 14.6   | 366.1   | 0.0   | 13.7   | 60.9  | 17.9  | 4.8  | 43.3   | 524.7   |
| 34              | SSBM | 2020 | 5.9  | 0.60 | 13.1  | 26.3   | 799.6   | 0.0   | 21.7   | 61.3  | 6.4   | 4.4  | 90.3   | 1023.1  |
| 35              | SSBM | 2020 | 3.8  | 0.23 | 14.2  | 50.0   | 1137.3  | 0.0   | 26.6   | 60.7  | 11.6  | 5.4  | 123.8  | 1429.6  |
| 36              | SSBM | 2020 | 4.1  | 0.56 | 4.4   | 37.8   | 820.4   | 2.2   | 19.1   | 57.0  | 7.0   | 9.6  | 84.8   | 1042.3  |
| 37              | SSBM | 2020 | 4.6  | 0.05 | 16.2  | 60.3   | 1132.9  | 0.0   | 2.1    | 45.6  | 3.1   | 1.0  | 160.9  | 1422.1  |
| 38              | SSBM | 2020 | 3.6  | 0.83 | 5.9   | 24.7   | 702.1   | 0.3   | 28.0   | 74.2  | 6.5   | 3.7  | 110.2  | 955.6   |
| 39              | SSBM | 2021 | 5.6  | 0.17 | 71.4  | 516.1  | 1291.8  | 0.0   | 130.6  | 0     | 0.6   | 7.0  | 250.4  | 2267.9  |
| 40              | SSBM | 2021 | 8.8  | 0.36 | 16.0  | 239.8  | 1299.1  | 0.0   | 70.3   | 0     | 2.4   | 0.3  | 198.8  | 1826.7  |
| 41              | SSBM | 2021 | 6.4  | 0.00 | 13.6  | 225.8  | 1351.3  | 0.0   | 57.0   | 0     | 2.6   | 0.0  | 245.0  | 1895.5  |
| 42              | SSBM | 2021 | 7.1  | 0.21 | 31.0  | 636.5  | 1426.0  | 0.0   | 260.9  | 0     | 11.7  | 4.1  | 835.2  | 3205.4  |
| 43              | SSBM | 2021 | 6.4  | 0.64 | 19.8  | 482.6  | 1108.0  | 0.0   | 122.1  | 0     | 1.7   | 2.5  | 250.8  | 1987.4  |
| 44              | SSBM | 2021 | 7.8  | 0.38 | 38.6  | 854.1  | 1720.3  | 0.0   | 238.5  | 0     | 7.8   | 6.3  | 593.0  | 3458.7  |
| 45              | SSBM | 2021 | 6.6  | 0.00 | 23.8  | 974.2  | 2431.8  | 0.0   | 212.6  | 0     | 15.8  | 5.8  | 1047.3 | 4711.3  |
| 46              | SSBM | 2021 | 7.7  | 0.58 | 53.8  | 863.6  | 1745.0  | 0.0   | 241.1  | 0     | 5.9   | 5.0  | 470.8  | 3385.2  |
| 47              | SSBM | 2021 | 7.2  | 0.94 | 30.2  | 725.5  | 1830.1  | 0.0   | 323.2  | 0     | 17.2  | 6.7  | 933.3  | 3866.1  |
| 48              | SSBM | 2021 | 4.5  | 0.28 | 10.9  | 228.0  | 990.4   | 43.0  | 145.0  | 0     | 141.8 | 2.4  | 1876.1 | 3437.7  |
| 49              | SSBM | 2021 | 9.4  | 0.98 | 18.8  | 459.6  | 2733.0  | 0.0   | 378.1  | 0     | 26.8  | 16.7 | 1076.2 | 4709.2  |
| 50              | SSBM | 2021 | 5.9  | 0.69 | 3.5   | 56.3   | 788.0   | 1.2   | 140.7  | 0     | 15.4  | 7.8  | 181.7  | 1194.6  |
| 51              | SSBM | 2021 | 4.4  | 0.53 | 12.3  | 242.1  | 1386.8  | 0.0   | 113.8  | 0     | 4.5   | 7.1  | 249.4  | 2016.0  |
| 52              | SSBM | 2021 | 7.8  | 0.02 | 6.8   | 89.3   | 1050.2  | 0.0   | 215.2  | 0     | 5.4   | 8.7  | 274.7  | 1650.4  |
| 53              | SSBM | 2021 | 6.8  | 0.93 | 4.0   | 32.0   | 426.7   | 11.1  | 40.0   | 39.3  | 2.0   | 4.3  | 133.8  | 693.3   |
| 54<br>(HP300) * | SSBM | 2021 | 9.3  | 2.29 | 75.8  | 118.2  | 1779.2  | 12.1  | 148.6  | 21.8  | 11.2  | 3.5  | 423.6  | 2594.0  |
| 55              | MSBM | 2021 | 7.7  | 0.79 | 9.8   | 33.7   | 309.4   | 24.7  | 52.8   | 96.4  | 2.8   | 4.6  | 105.6  | 639.9   |
| 56              | MSBM | 2021 | 10.9 | 1.58 | 29.1  | 88.4   | 759.0   | 25.7  | 102.3  | 106.2 | 6.8   | 6.7  | 246.4  | 1370.6  |
| 57              | MSBM | 2021 | 11.4 | 0.88 | 26.4  | 88.1   | 1780.8  | 27.8  | 142.4  | 87.1  | 22.0  | 7.2  | 457.5  | 2639.2  |
| 58              | MSBM | 2021 | 14.1 | 0.49 | 629.1 | 1791.7 | 17492.8 | 161.4 | 2364.8 | 215.4 | 227.8 | 21.2 | 9671.3 | 32575.6 |
| 59              | MSBM | 2021 | 6.4  | 1.31 | 8.9   | 42.2   | 619.1   | 14.5  | 50.3   | 57.8  | 4.2   | 6.2  | 205.3  | 1008.5  |
| 60              | MSBM | 2021 | 5.2  | 1.73 | 35.4  | 122.4  | 1241.7  | 30.0  | 159.9  | 97.0  | 8.2   | 6.7  | 360.8  | 2062.1  |
| 61              | MSBM | 2021 | 8.3  | 1.49 | 10.3  | 52.9   | 174.1   | 15.4  | 27.4   | 64.0  | 4.2   | 12.4 | 35.8   | 396.5   |
| 62              | MSBM | 2021 | 9.7  | 1.71 | 160.9 | 456.6  | 5048.6  | 120.9 | 1009.7 | 172.8 | 59.6  | 25.8 | 1884.0 | 8938.8  |

\* This sample was produced by treating conventional SSBM with a mixture of enzymes and posttreatment heating.

**Table S6. Antioxidants of SSBM and MSBM Samples**

| #  | Sample type | Year | TEAC | Total phenolic content (mg/g caffeic acid equivalent DM) | $\alpha$ -tocopherol | $\gamma$ -tocopherol | Daidzin | Genistin | Daidzein | Genistein |
|----|-------------|------|------|----------------------------------------------------------|----------------------|----------------------|---------|----------|----------|-----------|
|    |             |      |      |                                                          | $\mu\text{g/g DM}$   |                      |         |          |          |           |
| 1  | SSBM        | 2020 | 24.6 | 1.05                                                     | 0.008                | 6.1                  | 397.8   | 1527.6   | 42.3     | 42.3      |
| 2  | SSBM        | 2020 | 25.0 | 1.34                                                     | 0.015                | 5.7                  | 577.1   | 2153.4   | 42.7     | 35.9      |
| 3  | SSBM        | 2020 | 25.0 | 1.34                                                     | 0.003                | 5.9                  | 451.2   | 1488.0   | 14.8     | 17.1      |
| 4  | SSBM        | 2020 | 25.4 | 1.14                                                     | 0.008                | 5.6                  | 460.2   | 1551.0   | 21.2     | 20.1      |
| 5  | SSBM        | 2020 | 24.3 | 1.32                                                     | 0.001                | 1.7                  | 384.3   | 1166.4   | 15.7     | 15.7      |
| 6  | SSBM        | 2020 | 25.9 | 1.24                                                     | 0.001                | 5.9                  | 516.3   | 1865.2   | 35.8     | 34.6      |
| 7  | SSBM        | 2020 | 24.6 | 1.14                                                     | 0.010                | 1.6                  | 428.7   | 1444.5   | 20.1     | 20.1      |
| 8  | SSBM        | 2020 | 25.5 | 1.25                                                     | 0.017                | 4.4                  | 427.0   | 1500.7   | 61.2     | 48.7      |
| 9  | SSBM        | 2020 | 25.1 | 1.11                                                     | 0.015                | 7.8                  | 486.0   | 1753.6   | 34.7     | 33.6      |
| 10 | SSBM        | 2020 | 25.3 | 1.16                                                     | 0.000                | 7.3                  | 436.8   | 1480.5   | 16.7     | 17.8      |
| 11 | SSBM        | 2020 | 25.7 | 1.32                                                     | 0.001                | 6.3                  | 469.5   | 1655.9   | 20.9     | 22.0      |
| 12 | SSBM        | 2020 | 24.4 | 1.37                                                     | 0.004                | 7.0                  | 470.0   | 1558.6   | 24.6     | 24.6      |
| 13 | SSBM        | 2020 | 25.0 | 1.27                                                     | 0.002                | 2.4                  | 491.4   | 1866.2   | 23.2     | 27.6      |
| 14 | SSBM        | 2020 | 25.0 | 1.23                                                     | 0.003                | 6.7                  | 421.8   | 1418.2   | 17.9     | 17.9      |
| 15 | SSBM        | 2020 | 24.8 | 1.12                                                     | 0.006                | 4.1                  | 442.8   | 1542.5   | 45.1     | 39.4      |
| 16 | SSBM        | 2020 | 25.0 | 1.09                                                     | 0.002                | 7.8                  | 539.7   | 1891.8   | 31.3     | 30.2      |
| 17 | SSBM        | 2020 | 24.6 | 1.17                                                     | 0.005                | 8.3                  | 441.7   | 1459.0   | 15.6     | 16.7      |
| 18 | SSBM        | 2020 | 25.2 | 1.29                                                     | 0.003                | 6.7                  | 535.2   | 1807.5   | 26.9     | 25.8      |
| 19 | SSBM        | 2020 | 25.3 | 1.23                                                     | 0.004                | 13.1                 | 512.6   | 1643.4   | 24.4     | 23.3      |
| 20 | SSBM        | 2020 | 25.3 | 1.22                                                     | 0.004                | 8.9                  | 445.7   | 1469.2   | 43.3     | 35.6      |
| 21 | SSBM        | 2020 | 25.5 | 1.19                                                     | 0.007                | 8.8                  | 483.1   | 1705.0   | 41.5     | 34.7      |
| 22 | SSBM        | 2020 | 24.6 | 1.36                                                     | 0.007                | 10.2                 | 459.8   | 1542.6   | 22.2     | 22.2      |
| 23 | SSBM        | 2020 | 25.2 | 1.17                                                     | 0.001                | 8.5                  | 413.1   | 1545.3   | 40.2     | 38.0      |
| 24 | SSBM        | 2020 | 25.5 | 1.15                                                     | 0.011                | 9.3                  | 495.0   | 1825.9   | 33.7     | 31.5      |
| 25 | SSBM        | 2020 | 25.0 | 1.03                                                     | 0.012                | 7.3                  | 456.5   | 1593.9   | 26.8     | 24.6      |
| 26 | SSBM        | 2020 | 24.2 | 1.08                                                     | 0.003                | 5.7                  | 444.0   | 1515.6   | 23.0     | 21.9      |
| 27 | SSBM        | 2020 | 24.0 | 1.08                                                     | 0.009                | 1.8                  | 414.7   | 1377.0   | 18.7     | 16.5      |
| 28 | SSBM        | 2020 | 24.5 | 1.20                                                     | 0.002                | 25.9                 | 439.6   | 1452.0   | 12.2     | 13.3      |
| 29 | SSBM        | 2020 | 24.5 | 1.06                                                     | 0.001                | 1.6                  | 291.8   | 1114.8   | 21.2     | 20.0      |
| 30 | SSBM        | 2020 | 25.2 | 0.72                                                     | 0.059                | 3.1                  | 619.1   | 2198.5   | 30.0     | 34.5      |
| 31 | SSBM        | 2020 | 24.9 | 1.13                                                     | 0.012                | 8.0                  | 387.1   | 1327.5   | 12.3     | 13.4      |
| 32 | SSBM        | 2020 | 24.8 | 1.17                                                     | 0.012                | 9.1                  | 499.1   | 1788.6   | 34.5     | 30.0      |
| 33 | SSBM        | 2020 | 25.2 | 1.16                                                     | 0.004                | 20.0                 | 512.1   | 1842.0   | 35.3     | 32.0      |

|              |      |      |      |      |       |      |       |        |       |      |
|--------------|------|------|------|------|-------|------|-------|--------|-------|------|
| 34           | SSBM | 2020 | 24.9 | 1.24 | 0.001 | 6.6  | 482.6 | 1690.9 | 15.5  | 17.8 |
| 35           | SSBM | 2020 | 25.1 | 0.98 | 0.007 | 4.5  | 581.6 | 2105.4 | 23.3  | 25.5 |
| 36           | SSBM | 2020 | 25.1 | 1.12 | 0.003 | 7.0  | 477.3 | 1542.4 | 20.1  | 19.0 |
| 37           | SSBM | 2020 | 25.7 | 1.10 | 0.002 | 5.8  | 506.3 | 1802.4 | 25.8  | 23.5 |
| 38           | SSBM | 2020 | 24.7 | 1.10 | 0.001 | 5.5  | 436.1 | 1495.8 | 21.1  | 18.9 |
| 39           | SSBM | 2021 | 22.6 | 0.96 | 0.011 | 3.4  | 453.4 | 1533.4 | 23.2  | 19.9 |
| 40           | SSBM | 2021 | 23.9 | 0.64 | 0.012 | 4.4  | 449.6 | 1472.6 | 32.0  | 26.5 |
| 41           | SSBM | 2021 | 24.1 | 1.01 | 0.001 | 4.3  | 458.7 | 1637.3 | 39.7  | 34.2 |
| 42           | SSBM | 2021 | 25.9 | 1.22 | 0.002 | 5.6  | 536.4 | 1931.4 | 35.2  | 29.7 |
| 43           | SSBM | 2021 | 27.2 | 1.33 | 0.001 | 4.1  | 522.4 | 1782.4 | 37.5  | 30.9 |
| 44           | SSBM | 2021 | 26.9 | 1.48 | 0.013 | 8.3  | 535.0 | 1839.5 | 36.2  | 31.8 |
| 45           | SSBM | 2021 | 26.2 | 1.23 | 0.007 | 17.8 | 403.0 | 1330.5 | 33.1  | 27.6 |
| 46           | SSBM | 2021 | 25.0 | 1.07 | 0.034 | 10.5 | 410.1 | 1546.0 | 27.7  | 26.6 |
| 47           | SSBM | 2021 | 24.7 | 1.07 | 0.005 | 7.9  | 415.0 | 1550.3 | 36.9  | 35.8 |
| 48           | SSBM | 2021 | 22.3 | 0.96 | 0.004 | 3.8  | 392.4 | 1404.9 | 22.1  | 23.2 |
| 49           | SSBM | 2021 | 24.6 | 1.15 | 0.012 | 5.2  | 417.0 | 1523.6 | 15.4  | 27.6 |
| 50           | SSBM | 2021 | 26.0 | 1.24 | 0.010 | 16.8 | 417.5 | 1602.8 | 34.2  | 29.8 |
| 51           | SSBM | 2021 | 26.4 | 1.11 | 0.009 | 8.6  | 376.7 | 1368.6 | 30.4  | 23.6 |
| 52           | SSBM | 2021 | 25.6 | 1.22 | 0.002 | 1.0  | 355.7 | 1182.2 | 29.6  | 13.2 |
| 53           | SSBM | 2021 | 23.7 | 1.31 | 0.003 | 9.8  | 538.6 | 1680.5 | 40.8  | 36.3 |
| 54 (HP300) * | SSBM | 2021 | 26.9 | 0.97 | 0.011 | 6.9  | 402.0 | 1384.5 | 113.9 | 66.6 |
| 55           | MSBM | 2021 | 23.3 | 0.68 | 0.011 | 9.7  | 264.0 | 861.7  | 21.1  | 31.7 |
| 56           | MSBM | 2021 | 22.6 | 0.56 | 0.014 | 23.1 | 395.7 | 1240.0 | 30.6  | 34.8 |
| 57           | MSBM | 2021 | 24.2 | 0.93 | 0.137 | 21.8 | 375.3 | 1222.7 | 56.9  | 56.9 |
| 58           | MSBM | 2021 | 23.8 | 0.54 | 0.560 | 16.2 | 300.1 | 1082.1 | 48.8  | 43.6 |
| 59           | MSBM | 2021 | 23.0 | 0.95 | 0.018 | 15.1 | 253.5 | 726.8  | 16.8  | 18.9 |
| 60           | MSBM | 2021 | 23.3 | 0.91 | 0.004 | 8.7  | 347.2 | 899.8  | 23.3  | 23.3 |
| 61           | MSBM | 2021 | 24.9 | 1.20 | 0.046 | 9.0  | 411.2 | 1377.5 | 35.7  | 39.9 |
| 62           | MSBM | 2021 | 23.8 | 1.12 | 0.018 | 10.3 | 322.0 | 1151.7 | 48.3  | 50.4 |

\* This sample was produced by treating conventional SSBM with a mixture of enzymes and posttreatment heating.



**A**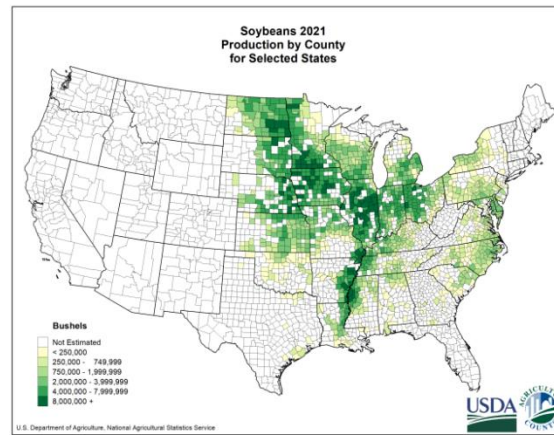**B**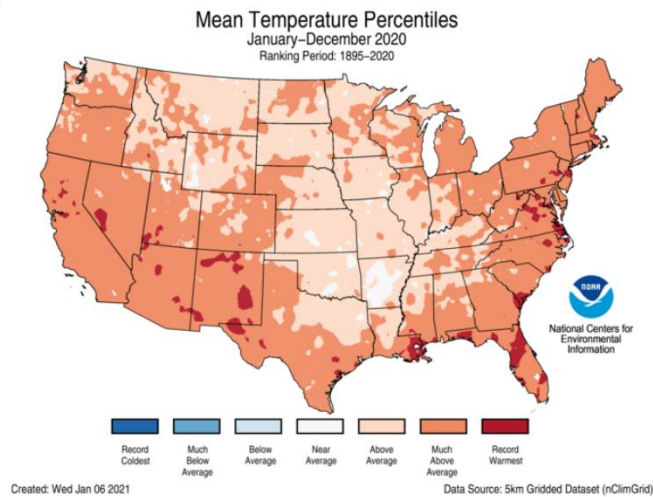**C**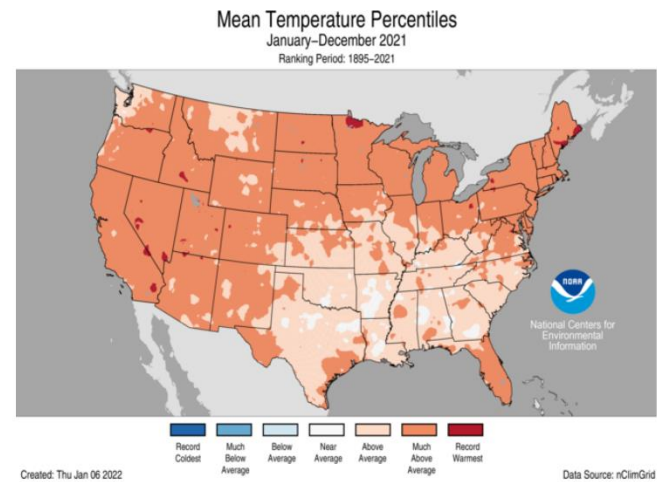

**Figure S1.** Soybean Production Map and Mean Temperature in the United States. **(A)** USDA map of 2021 soybeans production (copied from [https://www.nass.usda.gov/Charts\\_and\\_Maps/Crops\\_County/sb-pr.php](https://www.nass.usda.gov/Charts_and_Maps/Crops_County/sb-pr.php)), **(B)** NOAA map of mean temperature percentiles in 2020 (copied from <https://www.ncei.noaa.gov/news/national-climate-202012>), **(C)** NOAA map of mean temperature percentiles in 2021 (copied from <https://www.ncei.noaa.gov/news/national-climate-202112>).
